# Supplementary material
Source: HighWire-hosted journal article supplement (https://www.rcpjournals.org/highwire/filestream/13960/field_highwire_adjunct_files/1/Brown_supplementary_material_S2.pdf)
Supplement: Brown_supplementary_material_S2.pdf [file Brown_supplementary_material_S2.pdf]

## Questionnaire for Clinicians: Feedback on working with Clinical Assistants

Clinical Assistants (CAs) describe the workforce of medical students and IMGs (without GMC registration) who have been recruited by NGH to help with the COVID19 pandemic response. Often allocated to a specific ward or specialty for a period of time, there has been a lot of anecdotal positive feedback about their help. We are currently collecting data on describing the workload of CAs and their role on the wards. We would appreciate your help in filling out this questionnaire which should only take several minutes to complete.

**Q1) Please select which grade you are currently working at.**

|     |                          |                       |                          |                        |                          |
|-----|--------------------------|-----------------------|--------------------------|------------------------|--------------------------|
| FY1 | <input type="checkbox"/> | CT1 – CT2 / ST1 – ST2 | <input type="checkbox"/> | Consultant             | <input type="checkbox"/> |
| FY2 | <input type="checkbox"/> | Registrar (ST3+)      | <input type="checkbox"/> | Other (please specify) | <input type="checkbox"/> |

**Q2) I have found that working with Clinical Assistants (CAs) has reduced my workload as a doctor. Please select if you agree or disagree with this statement.**

|                   |                          |          |                          |         |                          |       |                          |                |                          |
|-------------------|--------------------------|----------|--------------------------|---------|--------------------------|-------|--------------------------|----------------|--------------------------|
| Strongly disagree | <input type="checkbox"/> | Disagree | <input type="checkbox"/> | Neutral | <input type="checkbox"/> | Agree | <input type="checkbox"/> | Strongly agree | <input type="checkbox"/> |
|-------------------|--------------------------|----------|--------------------------|---------|--------------------------|-------|--------------------------|----------------|--------------------------|

**Q3) I have found that CAs can help provide continuity of care for patients if they have worked in one ward or specialty on a regular basis. For example, they are able to describe a patient's current issues and outstanding jobs. Please select if you agree or disagree with this statement.**

|                   |                          |          |                          |         |                          |       |                          |                |                          |
|-------------------|--------------------------|----------|--------------------------|---------|--------------------------|-------|--------------------------|----------------|--------------------------|
| Strongly disagree | <input type="checkbox"/> | Disagree | <input type="checkbox"/> | Neutral | <input type="checkbox"/> | Agree | <input type="checkbox"/> | Strongly agree | <input type="checkbox"/> |
|-------------------|--------------------------|----------|--------------------------|---------|--------------------------|-------|--------------------------|----------------|--------------------------|

**Q4) I regard CAs as colleagues and key members of the clinical team. Please select if you agree or disagree with this statement.**

|                   |                          |          |                          |         |                          |       |                          |                |                          |
|-------------------|--------------------------|----------|--------------------------|---------|--------------------------|-------|--------------------------|----------------|--------------------------|
| Strongly disagree | <input type="checkbox"/> | Disagree | <input type="checkbox"/> | Neutral | <input type="checkbox"/> | Agree | <input type="checkbox"/> | Strongly agree | <input type="checkbox"/> |
|-------------------|--------------------------|----------|--------------------------|---------|--------------------------|-------|--------------------------|----------------|--------------------------|

**Q5) I believe the benefits of working as a CA at NGH include (multiple choice question, please select as many options as you agree with)**

|                                                                                                                                                                                       |                          |
|---------------------------------------------------------------------------------------------------------------------------------------------------------------------------------------|--------------------------|
| Increased competency with practical procedures e.g. venepuncture, cannulation etc                                                                                                     | <input type="checkbox"/> |
| Increased understanding of working as a junior doctor and what is expected of a junior doctor e.g. medical documentation on ward rounds, writing discharge letters, clerking patients | <input type="checkbox"/> |
| Increased understanding of how the NHS works                                                                                                                                          | <input type="checkbox"/> |
| Developing communication skills                                                                                                                                                       | <input type="checkbox"/> |
| Developing teamwork skills                                                                                                                                                            | <input type="checkbox"/> |
| Developing organisation and planning skills e.g. prioritising time and workload                                                                                                       | <input type="checkbox"/> |
| Developing ability to cope with pressure and developing resilience                                                                                                                    | <input type="checkbox"/> |
| Developing management and leadership skills                                                                                                                                           | <input type="checkbox"/> |
| Developing IT skills                                                                                                                                                                  | <input type="checkbox"/> |
| Other (please specify)                                                                                                                                                                | <input type="checkbox"/> |

**Q6) Whilst working with CAs, I have been able to offer bedside teaching on (multiple choice question, please select as many options as you may agree with)**

|                                                                          |                          |
|--------------------------------------------------------------------------|--------------------------|
| Practical procedures e.g. venepuncture, cannulation, catheters, NG tubes | <input type="checkbox"/> |
| History taking                                                           | <input type="checkbox"/> |
| Clinical examinations e.g. abdominal examination, cardiac examination,   | <input type="checkbox"/> |
| Differential diagnoses for a symptom / presenting complaint              | <input type="checkbox"/> |
| Common medical / surgical conditions                                     | <input type="checkbox"/> |

|                                                                 |  |
|-----------------------------------------------------------------|--|
| Discussing interpretations of investigations e.g. bloods, scans |  |
| Other (please specify)                                          |  |

**Q7)** Taking part in the CA role at Northampton General Hospital will help the individual become a more competent future clinician than if they had not participated in the programme. **Please select if you agree or disagree with this statement.**

|                   |  |          |  |         |  |       |  |                |  |
|-------------------|--|----------|--|---------|--|-------|--|----------------|--|
| Strongly disagree |  | Disagree |  | Neutral |  | Agree |  | Strongly agree |  |
|-------------------|--|----------|--|---------|--|-------|--|----------------|--|

**Q8)** I believe that that the Clinical Assistant role should be incorporated into the medical school curriculum. **Please select which one option you most agree with.**

|                                                                        |  |
|------------------------------------------------------------------------|--|
| Yes – as part of the final year of medical school                      |  |
| Yes – as part of 3 <sup>rd</sup> or 4 <sup>th</sup> year               |  |
| Yes – as part of 1 <sup>st</sup> or 2 <sup>nd</sup> year               |  |
| Yes – as a part time job or a summer holiday job during medical school |  |
| No – please specify why                                                |  |

**Q9)** Do you have any other positive or constructive feedback you would like to share about CAs that has not been covered by this questionnaire?
